# Supplementary material for: Synthesis of new benzothiazole Schiff base as selective and sensitive colorimetric sensor for arsenic on-site detection at ppb level
Source: Royal Society of Chemistry journal article supplement (doi:10.1039/c6ay03302d), 2017-01-01
Supplement: c6ay03302d1.pdf [file c6ay03302d1.pdf]

**Synthesis of New Benzothiazole Schiff Base as Selective and Sensitive Colorimetric Sensor  
for Arsenic on-site Detection at ppb Level**

Kalpana Chauhan<sup>1</sup>, Prem Singh<sup>1</sup>, Bhawana Kumari<sup>1</sup> and Rakesh Kumar Singhal<sup>2</sup>

<sup>1</sup>Department of Chemistry, Shoolini University, Solan 173229, India

<sup>2</sup>Analytical Chemistry Division, Bhabha Atomic Research Center, Mumbai-4000085, India

\*email: [kalpana13chauhan@gmail.com](mailto:kalpana13chauhan@gmail.com)

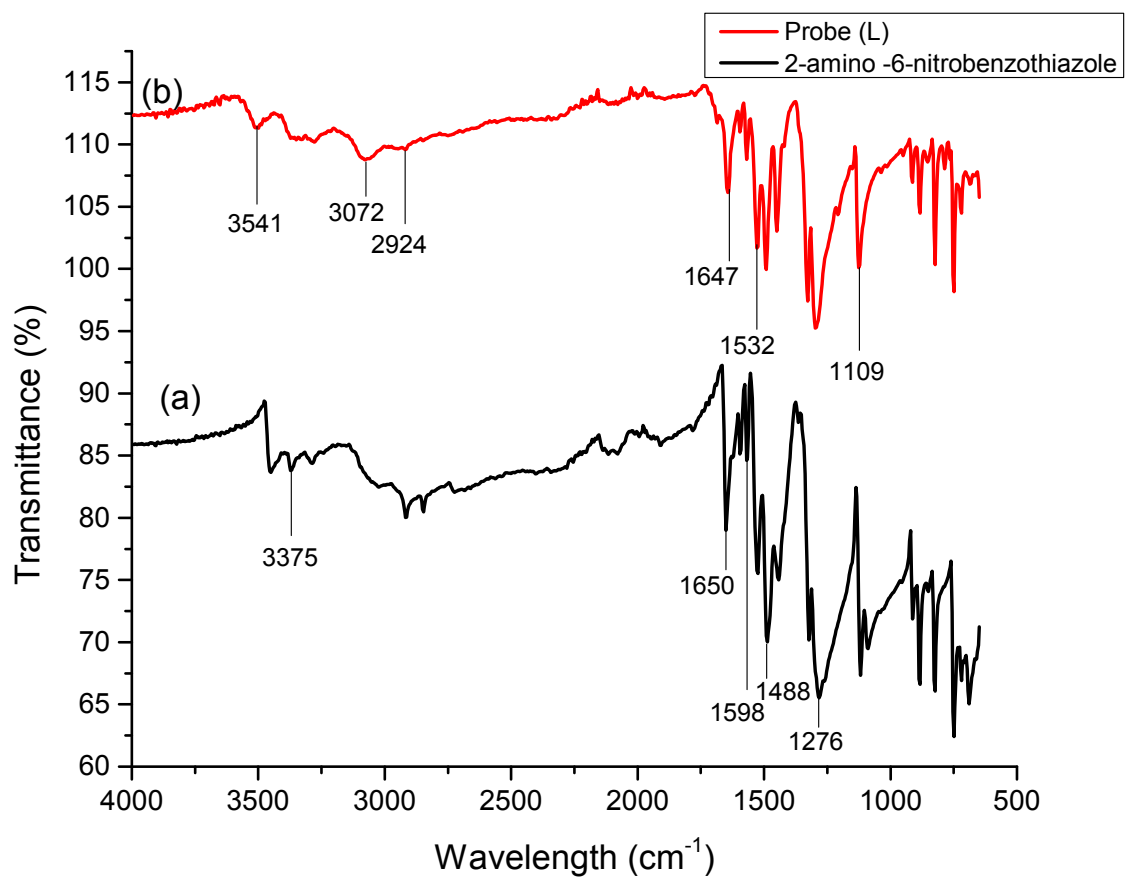

**Fig. S1** FTIR spectra for (a) 2- amino-6-nitrobenzothiazole and (b) probe **L**

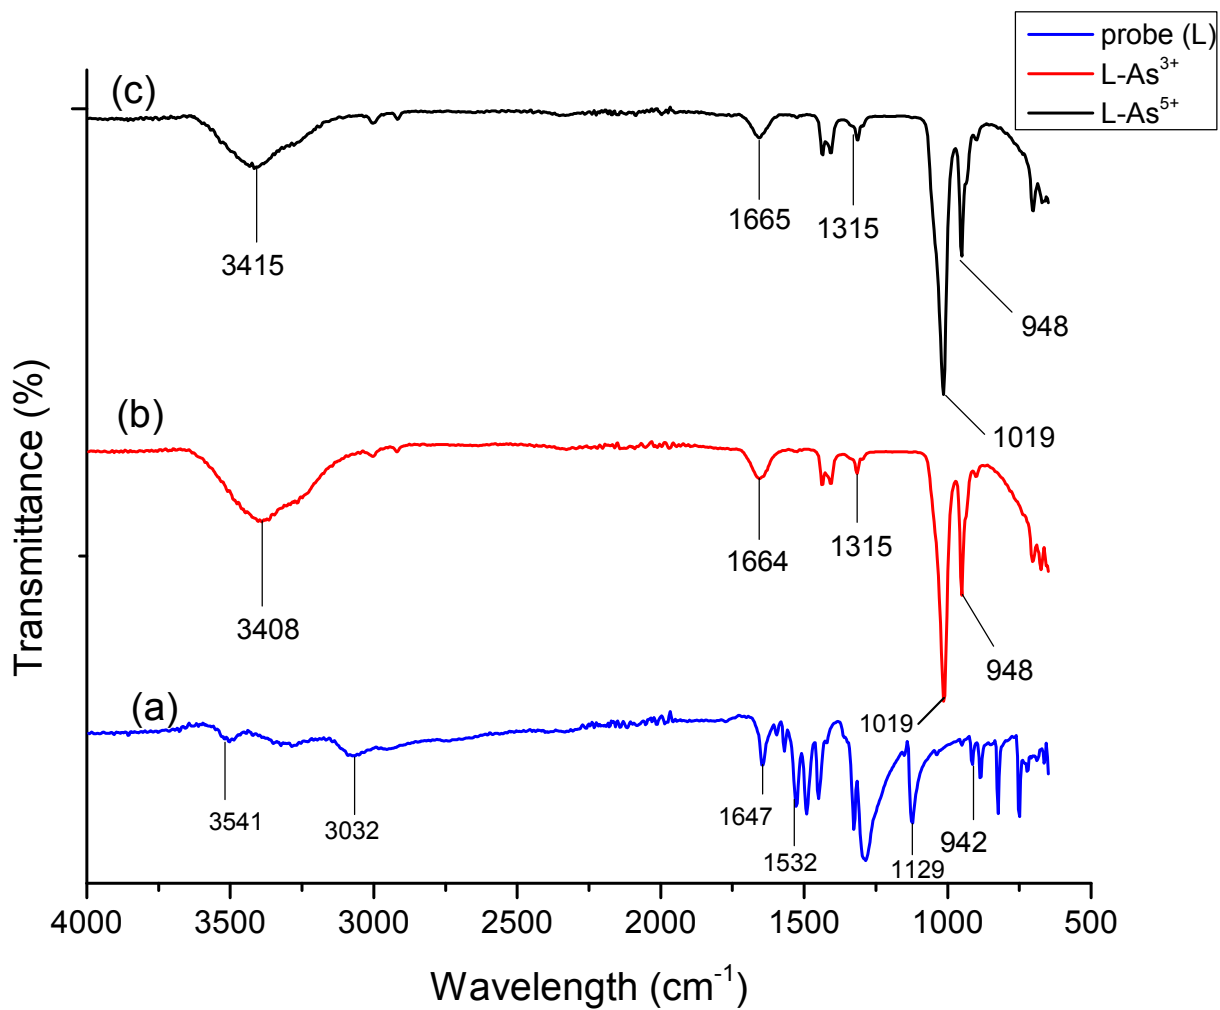

**Fig. S2** FTIR spectra of (a) probe (L) and (b) L-As<sup>3+</sup> complex (c) L-As<sup>5+</sup> complex
